# Supplementary material for: Precision of quantitative computed tomography texture analysis using image filtering: A phantom study for scanner variability
Source: PubMed Central journal article supplement (PMC5457888; doi:10.1097/md.0000000000006993), 2017-05-26

**Supplemental Figure 1.** The phantom was located so that its center was the same as the isocenter of the computed tomography scanner and its long axis perpendicular to the gantry.

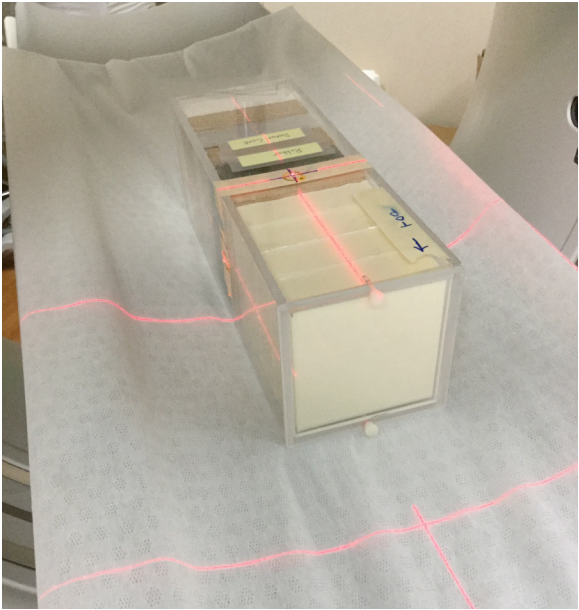

**Supplemental Figure 2.** Computed tomography images of the phantom (cartridge A to J corresponds to (A) to (J)). Images are shown with a window level of  $-185$  Hounsfield units and a window width of  $2160$  Hounsfield units.

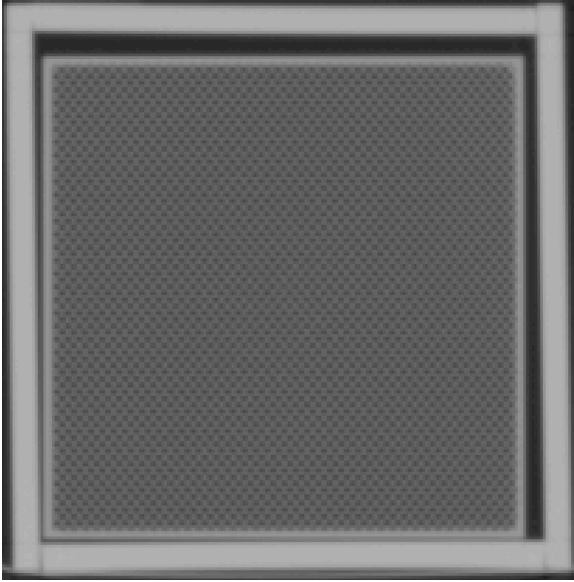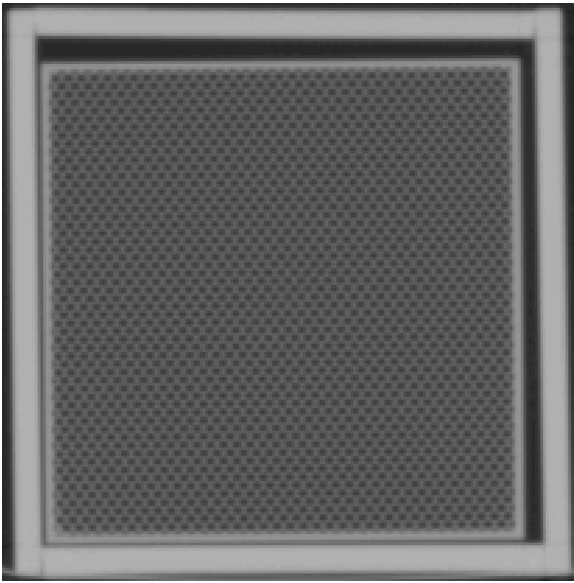

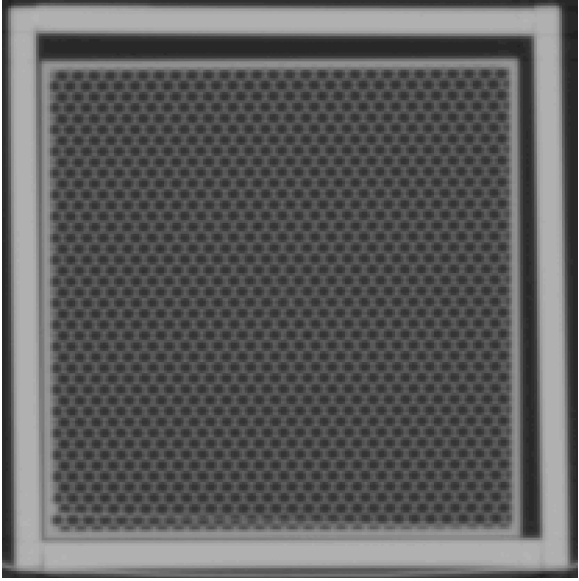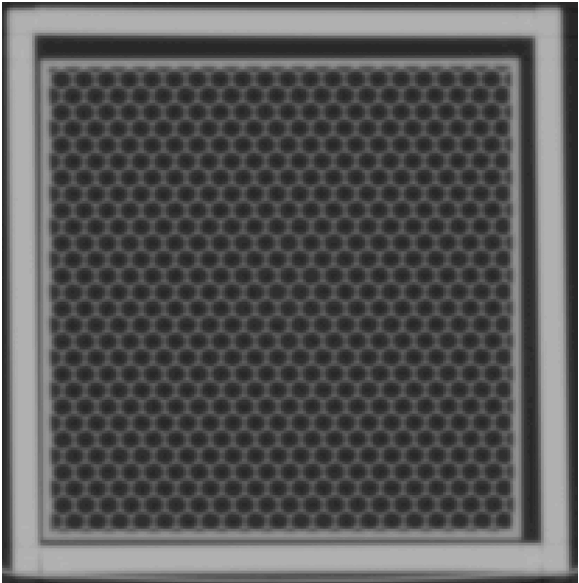

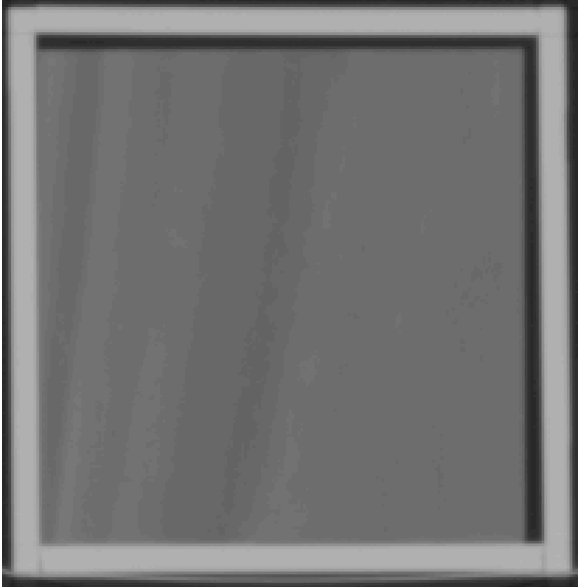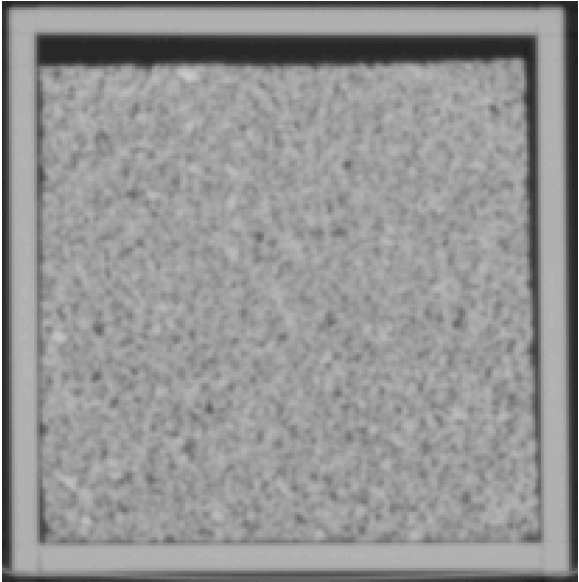

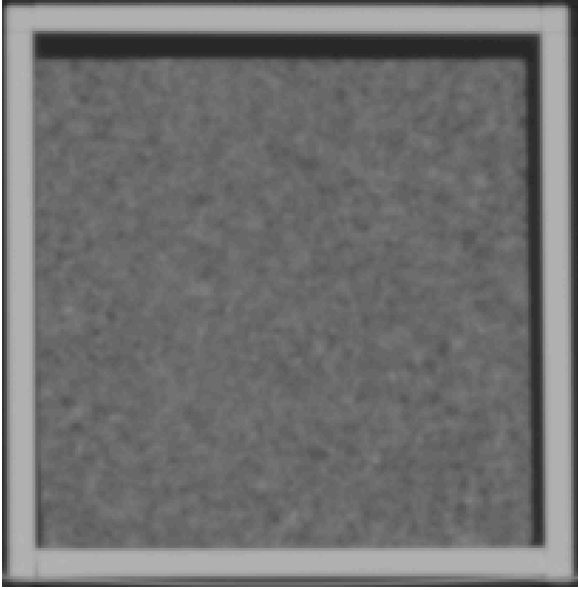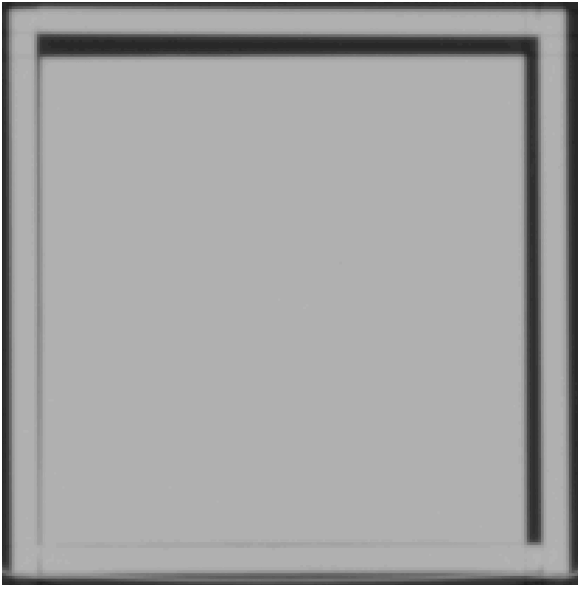

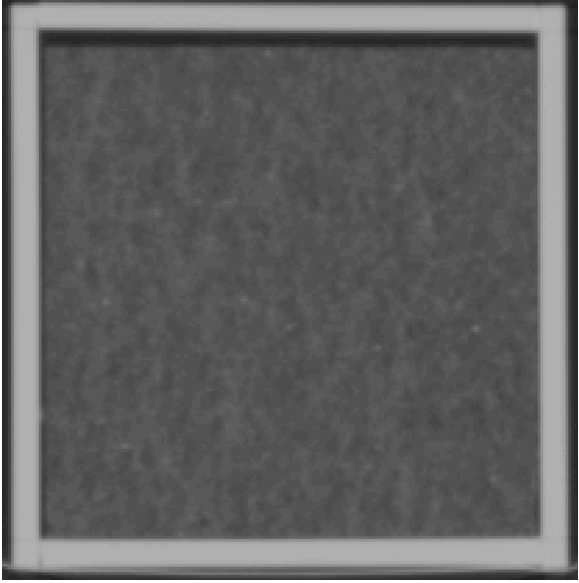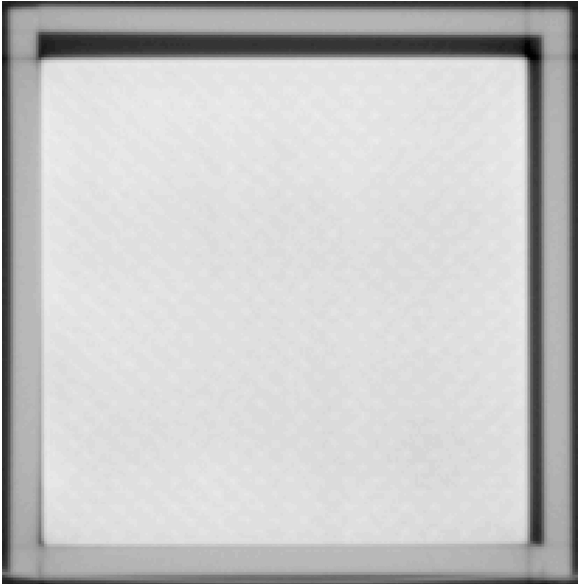

Supplement: medi-96-e6993-s001.pdf [file medi-96-e6993-s001.pdf]
